# Supplementary material for: Challenges and recommendations for environmental sustainability assessments of pharmaceutical products in the healthcare sector
Source: Royal Society of Chemistry journal article supplement (doi:10.1039/c7gc00833c), 2017-01-01
Supplement: c7gc00833c1.pdf [file c7gc00833c1.pdf]

De Soete et al., 2017, Green Chemistry: ESI1

|    |     |                                              |                         |       |                    |                                          |                                                                                                                                                                         |                                                                                                                          |                  |           | Citations |                                             |      |     |
|----|-----|----------------------------------------------|-------------------------|-------|--------------------|------------------------------------------|-------------------------------------------------------------------------------------------------------------------------------------------------------------------------|--------------------------------------------------------------------------------------------------------------------------|------------------|-----------|-----------|---------------------------------------------|------|-----|
|    | TAG | Criterion                                    | Authors                 | Year  | Years<br>Published | Publication Type                         | Topic                                                                                                                                                                   | Impact Assessment Method                                                                                                 | System Boundary  | Citations | per year  | Journal (ISO)                               | IF   | Q   |
| 1  | 1   | Sustainability Assessment of Pharmaceuticals | Wernet et al.           | 2009  | 8                  | Methodological framework with case study | Bridging data gaps in environmental assessments: Modeling impacts of fine and basic chemical production                                                                 | LCA, midpoints covered                                                                                                   | Cradle-to-Gate   | 34        | 4         | Green Chem.                                 | 8.30 | Q1  |
| 2  | 1   | Sustainability Assessment of Pharmaceuticals | Jiménez-González et al. | 2010  | 7                  | Review with recommendations              | Bioprocesses: Modeling needs for process evaluation and sustainability assessment                                                                                       | Process Analysis and LCA                                                                                                 | Cradle-to-Gate   | 27        | 4         | Comput. Chem. Eng.                          | 2.87 | Q1  |
| 3  | 1   | Sustainability Assessment of Pharmaceuticals | Schneider et al.        | 2010  | 7                  | Review                                   | Pharmaceutical companies and sustainability: an analysis of corporate reporting                                                                                         | toolbox of social responsibility reporting                                                                               | N/A              | 8         | 1         | Benchmark Int J                             | N/A  | N/A |
| 4  | 1   | Sustainability Assessment of Pharmaceuticals | Jiménez-González et al. | 2011a | 8                  | Perspective with recommendations         | Using the Right Green Yardstick: Why Process Mass Intensity Is Used in the Pharmaceutical Industry To Drive More Sustainable Processes                                  | Green Chemistry toolbox                                                                                                  | Process Level    | 102       | 13        | Org. Process Res. Dev.                      | 2.53 | Q1  |
| 5  | 1   | Sustainability Assessment of Pharmaceuticals | Jiménez-González et al. | 2013  | 4                  | Methodological framework                 | Expanding the Boundaries: Developing a Streamlined Tool for Eco-Footprinting of Pharmaceuticals                                                                         | PMI + LCA                                                                                                                | Cradle-to-Gate   | 19        | 5         | Org. Process Res. Dev.                      | 2.54 | Q1  |
| 6  | 1   | Sustainability Assessment of Pharmaceuticals | De Soete et al.         | 2013  | 4                  | Case study                               | Exergetic sustainability assessment of batch versus continuous wet granulation based pharmaceutical tablet manufacturing: a cohesive analysis at three different levels | Combining RE at process level and LCA (CEENE)                                                                            | Cradle-to-Gate   | 6         | 2         | Green Chem.                                 | 8.30 | Q1  |
| 7  | 1   | Sustainability Assessment of Pharmaceuticals | Woodley et al.          | 2013  | 4                  | Perspective with recommendations         | A future perspective on the role of industrial biotechnology for chemicals production                                                                                   | N/A                                                                                                                      | N/A              | 9         | 2         | Chem. Eng. Res. Des.                        | 2.53 | Q2  |
| 8  | 1   | Sustainability Assessment of Pharmaceuticals | Szekely et al.          | 2014  | 3                  | Case study                               | Sustainability assessment of organic solvent nanofiltration: from fabrication to application                                                                            | CF                                                                                                                       | Cradle-to-Grave  | 15        | 5         | Green Chem.                                 | 8.30 | Q1  |
| 9  | 2   | Sustainability Assessment in Healthcare      | Briggs et al.           | 2003  | 14                 | Case study                               | Environmental pollution and the global burden of disease                                                                                                                | Health Economics combined with LCA                                                                                       | Cradle-to-Grave  | 71        | 5         | Br. Med. Bull.                              | 4.42 | Q1  |
| 10 | 2   | Sustainability Assessment in Healthcare      | Martin et al.           | 2009  | 8                  | Case study                               | Cost-effectiveness of infant vaccination with RIX4414 (Rotarix™) in the UK                                                                                              | Health Economics combined with LCA                                                                                       | Cradle-to-Grave  | 23        | 3         | Vaccines                                    | 3.62 | Q2  |
| 11 | 2   | Sustainability Assessment in Healthcare      | Boholm et al.           | 2014  | 3                  | Case study                               | Controversy over antibacterial silver: implications for environmental and sustainability assessments                                                                    | RA, MCA, LCA                                                                                                             | Cradle-to-Grave  | 3         | 1         | J. Clean Prod.                              | 4.17 | Q1  |
| 12 | 2   | Sustainability Assessment in Healthcare      | Carmen Carnero          | 2015  | 2                  | Methodological framework with case study | Assessment of Environmental Sustainability in Health Care Organizations                                                                                                 | MCA (CF, material use, toxicity, biodiversity, waste)                                                                    | Cradle-to-Grave  | 1         | 1         | Sustainability                              | 0.94 | Q3  |
| 13 | 2   | Sustainability Assessment in Healthcare      | Castro et al. (a)       | 2015  | 2                  | Review                                   | A critical analysis of building sustainability assessment methods for healthcare buildings                                                                              | BSA                                                                                                                      | Cradle-to-Cradle | 1         | 1         | Environment, Development and Sustainability | 0.91 | Q2  |
| 14 | 2   | Sustainability Assessment in Healthcare      | Castro et al. (b)       | 2015  | 2                  | Benchmarking                             | Development of Benchmarks for Operating Costs and Resources Consumption to be Used in Healthcare Building Sustainability Assessment Methods                             | Resource consumption, BSA                                                                                                | Cradle-to-Cradle | 0         | 0         | Sustainability                              | 0.94 | Q3  |
| 15 | 2   | Sustainability Assessment in Healthcare      | Debaveye et al.         | 2016  | 1                  | Methodological framework                 | Human health benefits and burdens of a pharmaceutical treatment: Discussion of a conceptual integrated approach                                                         | Health Economics combined with LCA                                                                                       | Cradle-to-Grave  | 0         | 0         | Environ. Res.                               | 4.37 | Q1  |
| 16 | 2   | Sustainability Assessment in Healthcare      | Marsch et al.           | 2016  | 1                  | Methodological framework                 | Expanding Health Technology Assessments to Include Effects on the Environment                                                                                           | Health Economics combined with LCA                                                                                       | Cradle-to-Grave  | 0         | 0         | Value in Health                             | 3.37 | Q1  |
| 17 | 3   | Life Cycle Assessment of Pharmaceuticals     | Jiménez-González et al. | 2000  | 17                 | PhD Thesis                               | Life Cycle Assessment in Pharmaceutical Applications                                                                                                                    | Green Chemistry + LCA Toolbox                                                                                            | Cradle-to-Gate   | N/A       | N/A       | N/A                                         | N/A  | N/A |
| 18 | 3   | Life Cycle Assessment of Pharmaceuticals     | Jiménez-González et al. | 2004  | 13                 | Case study                               | Cradle-to-gate life cycle inventory and assessment of pharmaceutical compounds                                                                                          | LCA, most midpoints covered                                                                                              | Gate-to-Gate     | 79        | 6         | Int. J. Life Cycle Assess.                  | 4.38 | Q1  |
| 19 | 3   | Life Cycle Assessment of Pharmaceuticals     | Curzons et al.          | 2007  | 10                 | Methodological framework                 | Fast life cycle assessment of synthetic chemistry (FLASC™) tool                                                                                                         | FLASC™, process-oriented metrics                                                                                         | Cradle-to-Gate   | 42        | 4         | Int. J. Life Cycle Assess.                  | 4.38 | Q1  |
| 20 | 3   | Life Cycle Assessment of Pharmaceuticals     | Kim et al.              | 2009  | 8                  | Methodological framework with case study | Enzymes for pharmaceutical applications-a cradle-to-gate life cycle assessment                                                                                          | FLASC™, nonrenewable energy consumption, global warming, acidification, eutrophication, and photochemical smog formation | Cradle-to-Grave  | 19        | 2         | Int. J. Life Cycle Assess.                  | 4.38 | Q1  |
| 21 | 3   | Life Cycle Assessment of Pharmaceuticals     | Wernet et al.           | 2010  | 7                  | Case study                               | Life cycle assessment of fine chemical production: a case study of pharmaceutical synthesis                                                                             | CED, GWP, EI99, ES2006, TRACI                                                                                            | Cradle-to-Gate   | 38        | 5         | Int. J. Life Cycle Assess.                  | 4.38 | Q1  |
| 22 | 3   | Life Cycle Assessment of Pharmaceuticals     | Igos et al.             | 2012  | 5                  | Benchmarking                             | Is it better to remove pharmaceuticals in decentralized or conventional wastewater treatment plants? A life cycle assessment comparison                                 | LCA, most midpoints covered                                                                                              | Cradle-to-Grave  | 9         | 2         | Sci. Total Environ.                         | 4.41 | Q1  |
| 23 | 3   | Life Cycle Assessment of Pharmaceuticals     | Alfonsín et al.         | 2014  | 3                  | Methodological framework with case study | PPCPs in wastewater – Update and calculation of characterization factors for their inclusion in LCA studies                                                             | USEtox and USES-LCA 2.0                                                                                                  | Gate-to-Cradle   | 1         | 0         | J. Clean Prod.                              | 4.17 | Q1  |
| 24 | 3   | Life Cycle Assessment of Pharmaceuticals     | De Soete et al.         | 2014  | 3                  | Methodological framework with case study | Environmental Sustainability Assessments of Pharmaceuticals: An Emerging Need for Simplification in Life Cycle Assessments                                              | Combining resource efficiency at process level and LCA (CEENE)                                                           | Cradle-to-Gate   | 0         | 0         | Environ. Sci. Technol.                      | 6.33 | Q1  |
| 25 | 3   | Life Cycle Assessment of Pharmaceuticals     | Jiménez-González et al. | 2014  | 3                  | Review                                   | The evolution of life cycle assessment in pharmaceutical and chemical applications - a perspective                                                                      | LCA, midpoints covered                                                                                                   | Cradle-to-Gate   | 5         | 2         | Green Chem.                                 | 8.30 | Q1  |
| 26 | 3   | Life Cycle Assessment of Pharmaceuticals     | Perez-Lopez et al.      | 2014  | 3                  | Case study                               | Life cycle assessment of the production of bioactive compounds from Tetraselmis suecica at pilot scale                                                                  | LCA                                                                                                                      | Cradle-to-Gate   | 4         | 1         | J. Clean Prod.                              | 4.17 | Q1  |

|    |   |                                            |                     |      |    |                                          |                                                                                                                                                             |                                                 |                  |     |    |                           |       |    |
|----|---|--------------------------------------------|---------------------|------|----|------------------------------------------|-------------------------------------------------------------------------------------------------------------------------------------------------------------|-------------------------------------------------|------------------|-----|----|---------------------------|-------|----|
| 27 | 3 | Life Cycle Assessment of Pharmaceuticals   | Brunet et al.       | 2014 | 3  | Methodological framework with case study | Combined simulation-optimization methodology to reduce the environmental impact of pharmaceutical processes: application to the production of Penicillin V  | Combining process analysis and LCA (CML + E199) | Cradle-to-Gate   | 1   | 0  | J. Clean Prod.            | 4.17  | Q1 |
| 28 | 3 | Life Cycle Assessment of Pharmaceuticals   | Ramasamy et al.     | 2014 | 3  | Review with recommendations              | Life cycle assessment as a tool to support decisionmaking in the biopharmaceutical industry: Considerations and challenges                                  | LCA                                             | Cradle-to-Gate   | 0   | 0  | Food Bioprod. Process.    | 2.82  | Q2 |
| 29 | 3 | Life Cycle Assessment of Pharmaceuticals   | Ott et al.          | 2014 | 3  | Case study                               | Life Cycle Analysis within Pharmaceutical Process Optimization and Intensification: Case Study of Active Pharmaceutical Ingredient Production               | Combining process analysis and LCA (ReCiPe)     | Cradle-to-Gate   | 3   | 1  | ChemSusChem               | 8.65  | Q1 |
| 30 | 3 | Life Cycle Assessment of Pharmaceuticals   | Ott et al.          | 2015 | 2  | Case study                               | Life cycle assessment of multi-step rufinamide synthesis – from isolated reactions in batch to continuous microreactor networks                             | Combining process analysis and LCA (ReCiPe)     | Cradle-to-Gate   | 0   | 0  | Green Chem.               | 8.30  | Q1 |
| 31 | 3 | Life Cycle Assessment of Pharmaceuticals   | Cespi et al.        | 2015 | 2  | Methodological framework with case study | Life cycle inventory improvement in the pharmaceutical sector: assessment of the sustainability combining PMI and LCA tools                                 | PMI + LCA                                       | Cradle-to-Gate   | 0   | 0  | Green Chem.               | 8.30  | Q1 |
| 32 | 3 | Life Cycle Assessment of Pharmaceuticals   | Kralisch et al.     | 2015 | 2  | Review with recommendations              | Rules and benefits of Life Cycle Assessment in green chemical process and synthesis design: a tutorial review                                               | LCA                                             | Cradle-to-Cradle | 7   | 4  | Green Chem.               | 8.30  | Q1 |
| 33 | 4 | Life Cycle Assessment in Healthcare        | Campion et al.      | 2012 | 5  | Case study                               | Life cycle assessment perspectives on delivering an infant in the US                                                                                        | TRACI                                           | Cradle-to-Grave  | 7   | 1  | Sci. Total Environ.       | 4.42  | Q1 |
| 34 | 4 | Life Cycle Assessment in Healthcare        | Thiel et al.        | 2015 | 2  | Review with recommendations              | Environmental Impacts of Surgical Procedures: Life Cycle Assessment of Hysterectomy in the United States                                                    | Hybrid LCA                                      |                  | 1   | 1  | Environ. Sci. Technol.    | 6.33  | Q1 |
| 35 | 5 | Green Chemistry related to Pharmaceuticals | Curzons et al.      | 1999 | 18 | Methodological framework                 | Solvent selection guide: a guide to the integration of environmental, health and safety criteria into the selection of solvents                             | Process Analysis                                | Process Level    | 10  | 1  | Clean. Technol. Envir.    | 1.93  | Q1 |
| 36 | 5 | Green Chemistry related to Pharmaceuticals | Curzons et al.      | 2001 | 16 | Perspective                              | So you think your process is green, how do you know?-Using principles of sustainability to determine what is green-a corporate perspective                  | Process Analysis                                | Process Level    | 156 | 10 | Green Chem.               | 8.30  | Q1 |
| 37 | 5 | Green Chemistry related to Pharmaceuticals | Constable et al.    | 2002 | 15 | Review with recommendations              | Metrics to 'green' chemistry - which are the best?                                                                                                          | Process Analysis                                | Gate-to-Gate     | 215 | 14 | Green Chem.               | 8.30  | Q1 |
| 38 | 5 | Green Chemistry related to Pharmaceuticals | Haswell et al.      | 2003 | 14 | Review                                   | Green chemistry: synthesis in micro reactors                                                                                                                | Green Chemistry toolbox                         | Process Level    | 111 | 8  | Green Chem.               | 8.30  | Q1 |
| 39 | 5 | Green Chemistry related to Pharmaceuticals | Nisiwaki            | 2003 | 14 | Review                                   | Green chemistry in process research and development in pharmaceutical industry                                                                              | Green Chemistry toolbox                         | Process Level    | 1   | 0  | J. Synth. Org. Chem. Jpn. | 0.71  | Q4 |
| 40 | 5 | Green Chemistry related to Pharmaceuticals | Thomas et al.       | 2005 | 12 | Methodological framework with case study | Designing catalysts for clean technology, green chemistry, and sustainable development                                                                      | Green Chemistry toolbox                         | Process Level    | 54  | 5  | Ann. Rev. Mater. Res.     | 17.98 | Q1 |
| 41 | 5 | Green Chemistry related to Pharmaceuticals | Koel et al.         | 2006 | 11 | Case study                               | Application of the principles of green chemistry in analytical chemistry                                                                                    | Green Chemistry toolbox                         | Process Level    | 66  | 6  | Pure Appl. Chem.          | 3.20  | Q2 |
| 42 | 5 | Green Chemistry related to Pharmaceuticals | Tucker              | 2006 | 11 | Review with recommendations              | Green chemistry, a pharmaceutical perspective                                                                                                               | Green Chemistry toolbox                         | Process Level    | 87  | 8  | Org. Process Res. Dev.    | 2.53  | Q1 |
| 43 | 5 | Green Chemistry related to Pharmaceuticals | Constable et al.    | 2007 | 10 | Perspective with recommendations         | Key green chemistry research areas - a perspective from pharmaceutical manufacturers                                                                        | Green Chemistry toolbox                         | Process Level    | 437 | 44 | Green Chem.               | 8.30  | Q1 |
| 44 | 5 | Green Chemistry related to Pharmaceuticals | Fortunak et al.     | 2007 | 10 | Review                                   | Strength and honor through the pharmaceutical industry's embrace of green chemistry?                                                                        | Green Chemistry toolbox                         | Process Level    | 1   | 0  | Curr. Opin. Drug. Disc.   | 5.12  | Q1 |
| 45 | 5 | Green Chemistry related to Pharmaceuticals | Khetan et al.       | 2007 | 10 | Review with recommendations              | Human pharmaceuticals in the aquatic environment: A challenge to green chemistry                                                                            | Green Chemistry toolbox                         | Cradle-to-Grave  | 326 | 33 | Chem. Rev.                | 50.68 | Q1 |
| 46 | 5 | Green Chemistry related to Pharmaceuticals | Kuemmerer           | 2007 | 10 | Review                                   | Sustainable from the very beginning: rational design of molecules by life cycle engineering as an important approach for green pharmacy and green chemistry | Green Chemistry toolbox                         | Process Level    | 51  | 5  | Green Chem.               | 8.30  | Q1 |
| 47 | 5 | Green Chemistry related to Pharmaceuticals | Alfonsi et al.      | 2008 | 9  | Methodological framework                 | Green chemistry tools to influence a medicinal chemistry and research chemistry based organisation                                                          | Green Chemistry toolbox                         | Process Level    | 309 | 34 | Green Chem.               | 8.30  | Q1 |
| 48 | 5 | Green Chemistry related to Pharmaceuticals | Cue et al.          | 2009 | 8  | Review                                   | Green process chemistry in the pharmaceutical industry                                                                                                      | Green Chemistry toolbox                         | Process Level    | 21  | 3  | Green Chem. Lett. Rev.    | 1.52  | Q3 |
| 49 | 5 | Green Chemistry related to Pharmaceuticals | Fortunak            | 2009 | 8  | Review                                   | Current and future impact of green chemistry on the pharmaceutical industry                                                                                 | Green Chemistry toolbox                         | Process Level    | 6   | 1  | Future Med. Chem.         | 3.79  | Q1 |
| 50 | 5 | Green Chemistry related to Pharmaceuticals | Garcia-Reyes et al. | 2009 | 8  | Case study                               | Flow-Through Solid-Phase Spectroscopy: A Contribution to Green Analytical Chemistry                                                                         | Green Chemistry toolbox                         | Process Level    | 4   | 1  | Spectr. Lett.             | 0.85  | Q4 |
| 51 | 5 | Green Chemistry related to Pharmaceuticals | Molina-Diaz et al.  | 2010 | 7  | Case study                               | How green chemistry can contribute to pharmaceutical industry sustainability: Accomplishments and opportunitites                                            | Green Chemistry toolbox                         | Process Level    | 13  | 2  | Trac-Trends Anal. Chem.   | 6.93  | Q1 |
| 52 | 5 | Green Chemistry related to Pharmaceuticals | Broxterman et al.   | 2011 | 6  | Methodological framework                 | Pharma and suppliers collaborating on Green Chemistry Launch of PMI tool                                                                                    | PMI Toolbox                                     | Process Level    | 3   | 1  | Chim. Oggi-Chem. Today    | 0.41  | Q4 |
| 53 | 5 | Green Chemistry related to Pharmaceuticals | Hartman et al.      | 2011 | 6  | Case study                               | Analytical Method Volume Intensity (AMVI): A green chemistry metric for HPLC methodology in the pharmaceutical industry                                     | Green Chemistry toolbox                         | Process Level    | 11  | 2  | Green Chem.               | 8.30  | Q1 |
| 54 | 5 | Green Chemistry related to Pharmaceuticals | Wernet et al.       | 2011 | 6  | Perspective with recommendations         | The Environmental Importance of Energy Use in Chemical Production                                                                                           | LCA                                             | Cradle-to-Gate   | 10  | 2  | J. Ind. Ecol.             | 3.70  | Q1 |

|    |   |                                                 |                         |       |   |                                          |                                                                                                                                                                                                                                 |                                               |                |    |    |                             |       |    |
|----|---|-------------------------------------------------|-------------------------|-------|---|------------------------------------------|---------------------------------------------------------------------------------------------------------------------------------------------------------------------------------------------------------------------------------|-----------------------------------------------|----------------|----|----|-----------------------------|-------|----|
| 55 | 5 | Green Chemistry related to Pharmaceuticals      | Jiménez-González et al. | 2011b | 8 | Perspective with recommendations         | Key Green Engineering Research Areas for Sustainable Manufacturing: A Perspective from Pharmaceutical and Fine Chemicals Manufacturers                                                                                          | N/A                                           | N/A            | 90 | 11 | Org. Process Res. Dev.      | 2.53  | Q1 |
| 56 | 5 | Green Chemistry related to Pharmaceuticals      | Joshi et al.            | 2011  | 6 | Review with recommendations              | Green Chemistry: Need of the Hour                                                                                                                                                                                               | Green Chemistry toolbox                       | Process Level  | 0  | 0  | Indian J. Pharm. Educ. Res. | 0.38  | Q4 |
| 57 | 5 | Green Chemistry related to Pharmaceuticals      | Soundarrajan et al.     | 2011  | 6 | Case study                               | Piperidone synthesis using amino acid: A promising scope for green chemistry                                                                                                                                                    | Green Chemistry toolbox                       | Process Level  | 0  | 0  | Microchem J.                | 3.05  | Q2 |
| 58 | 5 | Green Chemistry related to Pharmaceuticals      | Kaur et al.             | 2012  | 5 | Case study                               | Comparative Study of Various Green Chemistry Approaches for the Efficient Synthesis of 1,4-Dihydropyridines                                                                                                                     | Green Chemistry toolbox                       | Process Level  | 8  | 2  | Asian J. Chem.              | 0.36  | Q4 |
| 59 | 5 | Green Chemistry related to Pharmaceuticals      | Ley                     | 2012  | 5 | Methodological framework                 | On being green: Can flow chemistry help?                                                                                                                                                                                        | Green Chemistry toolbox                       | Process Level  | 74 | 15 | Chem. Rec.                  | 5.50  | Q1 |
| 60 | 5 | Green Chemistry related to Pharmaceuticals      | Watson                  | 2012  | 5 | Review with recommendations              | How do the fine chemical, pharmaceutical, and related industries approach green chemistry and sustainability?                                                                                                                   | Green Chemistry toolbox                       | Process Level  | 51 | 10 | Green Chem.                 | 8.30  | Q1 |
| 61 | 5 | Green Chemistry related to Pharmaceuticals      | Ciriminna               | 2013  | 4 | Review with recommendations              | Green Chemistry in the Fine Chemicals and Pharmaceutical Industries                                                                                                                                                             | Green Chemistry toolbox                       | Process Level  | 13 | 3  | Org. Process Res. Dev.      | 2.53  | Q1 |
| 62 | 5 | Green Chemistry related to Pharmaceuticals      | Dunn                    | 2013  | 4 | Perspective with recommendations         | Pharmaceutical Green Chemistry process changes - how long does it take to obtain regulatory approval?                                                                                                                           | Green Chemistry + LCA Toolbox                 | Cradle-to-Gate | 5  | 1  | Green Chem.                 | 8.30  | Q1 |
| 63 | 5 | Green Chemistry related to Pharmaceuticals      | Federsel                | 2013  | 4 | Perspective with recommendations         | En route to full implementation: driving the green chemistry agenda in the pharmaceutical industry                                                                                                                              | PMI Toolbox                                   | Cradle-to-Gate | 7  | 2  | Green Chem.                 | 8.30  | Q1 |
| 64 | 5 | Green Chemistry related to Pharmaceuticals      | Leahy et al.            | 2013  | 4 | Perspective with recommendations         | Seven Important Elements for an Effective Green Chemistry Program: An IQ Consortium Perspective                                                                                                                                 | Green Chemistry toolbox                       | Process Level  | 11 | 3  | Org. Process Res. Dev.      | 2.53  | Q1 |
| 65 | 5 | Green Chemistry related to Pharmaceuticals      | Osorio et al.           | 2014  | 3 | Case study                               | Photochemical derivatization of amitriptyline using a green chemistry approach: fluorimetric determination and photochemical reaction mechanism                                                                                 | Green Chemistry toolbox                       | Process Level  | 0  | 0  | Anal. Methods               | 1.84  | Q2 |
| 66 | 5 | Green Chemistry related to Pharmaceuticals      | Rastogi et al.          | 2014  | 3 | Methodological framework                 | Designing green derivatives of beta-blocker Metoprolol: A tiered approach for green and sustainable pharmacy and chemistry                                                                                                      | Green Chemistry Toolbox and QSAR              | Process Level  | 5  | 2  | Chemosphere                 | 3.85  | Q1 |
| 67 | 5 | Green Chemistry related to Pharmaceuticals      | Banimostafa et al.      | 2015  | 2 | Case study                               | Retrofit design of a pharmaceutical batch process considering "green chemistry and engineering" principles                                                                                                                      | LCA                                           | Cradle-to-Gate | 0  | 0  | AIChE J.                    | 2.75  | Q1 |
| 68 | 5 | Green Chemistry related to Pharmaceuticals      | DeVito et al.           | 2015  | 2 | Case study                               | Can pollutant release and transfer registers (PRTs) be used to assess implementation and effectiveness of green chemistry practices? A case study involving the Toxics Release Inventory (TRI) and pharmaceutical manufacturers | Green Chemistry toolbox                       | Process Level  | 0  | 0  | Green Chem.                 | 8.30  | Q1 |
| 69 | 5 | Green Chemistry related to Pharmaceuticals      | Gupta et al.            | 2015  | 2 | Perspective                              | Green chemistry approaches as sustainable alternatives to conventional strategies in the pharmaceutical industry                                                                                                                | Green Chemistry toolbox                       | Process Level  | 0  | 0  | RSC Adv.                    | 3.91  | Q1 |
| 70 | 5 | Green Chemistry related to Pharmaceuticals      | M'Hamed                 | 2015  | 2 | Perspective                              | Green chemistry approaches as sustainable alternatives to conventional strategies in the pharmaceutical industry                                                                                                                | Green Chemistry toolbox                       | Process Level  | 0  | 0  | Synth. Commun.              | 0.99  | Q3 |
| 71 | 5 | Green Chemistry related to Pharmaceuticals      | Roschangar et al.       | 2015  | 2 | Methodological framework with case study | Overcoming barriers to green chemistry in the pharmaceutical industry - the Green Aspiration Level™ concept                                                                                                                     | Green Chemistry toolbox                       | Process Level  | 7  | 4  | Green Chem.                 | 8.30  | Q1 |
| 72 | 5 | Green Chemistry related to Pharmaceuticals      | Sullivan                | 2015  | 2 | Review                                   | Pharmaceutical innovation and greener chemistry: Celebrating 20 years of impact                                                                                                                                                 | Green Chemistry toolbox                       | Process Level  | 0  | 0  | Chim. Oggi-Chem. Today      | 0.41  | Q4 |
| 73 | 5 | Green Chemistry related to Pharmaceuticals      | Tucker                  | 2015  | 2 | Methodological framework                 | Pharmaceutical Green Chemistry at Amgen: Seeing with New Eyes                                                                                                                                                                   | Green Chemistry toolbox                       | Process Level  | 0  | 0  | Aldrichimica Acta           | 17.08 | Q1 |
| 74 | 5 | Green Chemistry related to Pharmaceuticals      | Voorhees                | 2015  | 2 | Perspective with recommendations         | ACS GCI Pharmaceutical Roundtable Celebrates 10 Years Of Green Chemistry Innovation                                                                                                                                             | Green Chemistry toolbox                       | Process Level  | 0  | 0  | Chem. Eng. News             | 0.27  | Q4 |
| 75 | 5 | Green Chemistry related to Pharmaceuticals      | Gallou et al.           | 2016  | 1 | Case study                               | Surfactant technology applied toward an active pharmaceutical ingredient: more than a simple green chemistry advance                                                                                                            | Green Chemistry toolbox                       | Process Level  | 1  | 0  | Green Chem.                 | 8.30  | Q1 |
| 76 | 5 | Green Chemistry related to Pharmaceuticals      | Borukhova et al.        | 2016  | 1 | Case study                               | Hydrogen Chloride Gas in Solvent-Free Continuous Conversion of Alcohols to Chlorides in Microflow                                                                                                                               | Green Chemistry toolbox                       | Process Level  | 0  | 0  | Org. Process Res. Dev.      | 2.53  | Q1 |
| 77 | 7 | Resource Consumption related to Pharmaceuticals | Van der Vorst et al.    | 2009  | 8 | Case study                               | Exergetic life cycle analysis for the selection of chromatographic separation processes in the pharmaceutical industry: preparative HPLC versus preparative SFC                                                                 | Combining RE at process level and LCA (CEENE) | Cradle-to-Gate | 26 | 3  | Green Chem.                 | 8.30  | Q1 |
| 78 | 7 | Resource Consumption related to Pharmaceuticals | Van der Vorst et al.    | 2009  | 8 | Methodological framework with case study | Assessment of the Integral Resource Consumption of Individual Chemical Production Processes in a Multipurpose Pharmaceutical Production Plant: A Complex Task                                                                   | Combining RE at process level and LCA (CEENE) | Cradle-to-Gate | 11 | 1  | Ind. Eng. Chem. Res.        | 2.74  | Q1 |
| 79 | 7 | Resource Consumption related to Pharmaceuticals | Van der Vorst et al.    | 2010  | 7 | Case study                               | Resource consumption of pharmaceutical waste solvent valorization alternatives                                                                                                                                                  | Resource efficiency analysis                  | Cradle-to-Gate | 4  | 1  | Resour. Conserv. Recycl.    | 3.28  | Q2 |
| 80 | 7 | Resource Consumption related to Pharmaceuticals | Van der Vorst et al.    | 2011  | 6 | Methodological framework                 | A Systematic Evaluation of the Resource Consumption of Active Pharmaceutical Ingredient Production at Three Different Levels                                                                                                    | Combining RE at process level and LCA (CEENE) | Cradle-to-Gate | 10 | 2  | Environ. Sci. Technol.      | 6.33  | Q1 |
| 81 | 7 | Resource Consumption related to Pharmaceuticals | Van der Vorst et al.    | 2013  | 4 | Case study                               | Reduced resource consumption through three generations of Galantamine-HBr synthesis                                                                                                                                             | Combining RE at process level and LCA (CEENE) | Cradle-to-Gate | 6  | 2  | Green Chem.                 | 8.30  | Q1 |
| 82 | 7 | Resource Consumption related to Pharmaceuticals | De Soete et al.         | 2014  | 3 | Case study                               | Environmental resource footprinting of drug manufacturing: Effects of scale-up and tablet dosage                                                                                                                                | Combining RE at process level and LCA (CEENE) | Cradle-to-Gate | 1  | 0  | Resour. Conserv. Recycl.    | 3.28  | Q2 |

|     |    |                                            |                        |      |    |                                  |                                                                                                                                                                                                  |                              |                 |    |   |                                  |      |    |
|-----|----|--------------------------------------------|------------------------|------|----|----------------------------------|--------------------------------------------------------------------------------------------------------------------------------------------------------------------------------------------------|------------------------------|-----------------|----|---|----------------------------------|------|----|
| 83  | 8  | Resource Consumption related to Healthcare | Hatoum et al.          | 1998 | 19 | Case study                       | Insomnia, health-related quality of life and healthcare resource consumption - A study of managed-care organisation enrollees                                                                    | Resource efficiency analysis | Process Level   | 91 | 5 | Pharmacoeconomics                | 2.57 | Q1 |
| 84  | 8  | Resource Consumption related to Healthcare | Optenberg              | 2002 | 15 | Case study                       | Antidepressant selection, healthcare resource consumption and costs in a large workplace environment - US and Canadian perspectives                                                              | Resource efficiency analysis | Process Level   | 1  | 0 | Clin. Drug Invest.               | 1.61 | Q3 |
| 85  | 8  | Resource Consumption related to Healthcare | Alvarez et al.         | 2004 | 13 | Case study                       | Socioeconomic status and resource consumption in primary care                                                                                                                                    | Resource efficiency analysis | Process Level   | 3  | 0 | An. Pediatr.                     | 0.83 | Q4 |
| 86  | 8  | Resource Consumption related to Healthcare | Daskalaki et al.       | 2007 | 10 | Case study                       | Resource consumption in the infection control management of pertussis exposure among Healthcare workers in Pediatrics                                                                            | Resource efficiency analysis | Process Level   | 14 | 1 | Infect. Control Hosp. Epidemiol. | 4.50 | Q1 |
| 87  | 8  | Resource Consumption related to Healthcare | Manca                  | 2008 | 9  | Case study                       | Quality of life, resource consumption and costs of spinal cord stimulation versus conventional medical management in neuropathic pain patients with failed back surgery syndrome (PROCESS trial) | Resource efficiency analysis | Process Level   | 59 | 7 | Eur. J. Pain                     | 3.51 | Q2 |
| 88  | 8  | Resource Consumption related to Healthcare | Leekha                 | 2009 | 8  | Case study                       | Epidemiology and Control of Pertussis Outbreaks in a Tertiary Care Center and the Resource Consumption Associated With These Outbreaks                                                           | Resource efficiency analysis | Process Level   | 10 | 1 | Infect. Control Hosp. Epidemiol. | 4.50 | Q1 |
| 89  | 8  | Resource Consumption related to Healthcare | Gonzalez-Cortes et al. | 2011 | 6  | Case study                       | Prolonged stay in pediatric intensive care units: mortality and healthcare resource consumption                                                                                                  | Resource efficiency analysis | Process Level   | 6  | 1 | Med. Intensiv.                   | 1.33 | Q4 |
| 90  | 8  | Resource Consumption related to Healthcare | Gagliardino et al.     | 2012 | 5  | Case study                       | Patients' education, and its impact on care outcomes, resource consumption and working conditions: Data from the International Diabetes Management Practices Study (IDMPS)                       | Resource efficiency analysis | Process Level   | 16 | 3 | Diabetes Metab.                  | 3.27 | Q2 |
| 91  | 8  | Resource Consumption related to Healthcare | Polatli et al.         | 2012 | 5  | Case study                       | Chronic obstructive pulmonary disease and associated healthcare resource consumption in the Middle East and North Africa: The BREATHE study                                                      | Resource efficiency analysis | Process Level   | 8  | 2 | Respir. Med.                     | 3.09 | Q2 |
| 92  | 8  | Resource Consumption related to Healthcare | Roggeri et al.         | 2014 | 3  | Case study                       | Direct healthcare costs and resource consumption after acute coronary syndrome: a real-life analysis of an Italian subpopulation                                                                 | Resource efficiency analysis | Process Level   | 1  | 0 | Eur. J. Prev. Cardiol.           | 3.38 | Q2 |
| 93  | 8  | Resource Consumption related to Healthcare | Castro et al.          | 2015 | 2  | Methodological framework         | Development of Benchmarks for Operating Costs and Resources Consumption to be Used in Healthcare Building Sustainability Assessment Methods                                                      | BSA                          | Gate-to-Gate    | 0  | 0 | Sustainability                   | 0.94 | Q3 |
| 94  | 8  | Resource Consumption related to Healthcare | Martyn et al.          | 2015 | 2  | Case study                       | Reduction in hospital costs and resource consumption associated with the use of advanced topical hemostats during inpatient procedures                                                           | Resource efficiency analysis | Process Level   | 0  | 0 | J. Med. Econ.                    | 1.66 | Q1 |
| 95  | 9  | Carbon Footprinting of Pharmaceuticals     | Connor et al.          | 2010 | 7  | Case study                       | The carbon footprint of a renal service in the United Kingdom                                                                                                                                    | CF                           | Cradle-to-Grave | 16 | 2 | QJM-An Int. J. Med.              | 2.62 | Q1 |
| 96  | 9  | Carbon Footprinting of Pharmaceuticals     | Gatenby                | 2011 | 6  | Case study                       | Modelling the carbon footprint of reflux control                                                                                                                                                 | CF                           | Cradle-to-Grave | 5  | 1 | Int. J. Surg.                    | 1.80 | Q2 |
| 97  | 9  | Carbon Footprinting of Pharmaceuticals     | Lim et al.             | 2013 | 4  | Case study                       | The carbon footprint of an Australian satellite haemodialysis unit                                                                                                                               | CF                           | Cradle-to-Grave | 4  | 1 | Aust. Health Rev.                | 0.96 | Q4 |
| 98  | 10 | Carbon Footprinting in Healthcare          | Connor et al.          | 2011 | 6  | Case study                       | The carbon footprints of home and in-center maintenance hemodialysis in the United Kingdom                                                                                                       | CF                           | Cradle-to-Grave | 25 | 4 | Hemodial. Int.                   | 1.36 | Q3 |
| 99  | 10 | Carbon Footprinting in Healthcare          | Wormer et al.          | 2013 | 4  | Review with recommendations      | The Green Operating Room: Simple Changes to Reduce Cost and Our Carbon Footprint                                                                                                                 | CF                           | Cradle-to-Grave | 5  | 1 | Am. Surg.                        | 1.11 | Q4 |
| 100 | 10 | Carbon Footprinting in Healthcare          | Holmer et al.          | 2014 | 3  | Perspective with recommendations | Carbon Footprint of Telemedicine Solutions - Unexplored Opportunity for Reducing Carbon Emissions in the Health Sector                                                                           | CF                           | Cradle-to-Grave | 1  | 0 | PLoS One                         | 3.70 | Q1 |
| 101 | 10 | Carbon Footprinting in Healthcare          | Pollard et al.         | 2014 | 3  | Review with recommendations      | The carbon footprint of acute care: how energy intensive is critical care?                                                                                                                       | CF                           | Cradle-to-Gate  | 0  | 0 | Public Health                    | 1.62 | Q2 |
